# Supplementary material for: LC-MS Based Metabolomic Profiling of Largehead Hairtail (Trichiurus japonicus) Ovary Reveals Metabolic Signatures of Ovarian Developmental Process (II–IV)
Source: MDPI journal article supplement (doi:10.3390/fishes8050262), 2023-05-14
Supplement: s1 [file s1]

# LC-MS Based Metabolomic Profiling of Largehead Hairtail (*Trichiurus japonicus*) Ovary Reveals Metabolic Signatures of Ovarian Developmental Process (II–IV)

Liu-Ying Feng <sup>1,2</sup>, Li-Ping Yan <sup>2,3</sup>, Run-Wei Li <sup>1,2</sup>, Sheng-Fa Li <sup>2,3</sup>, Jia-Hua Cheng <sup>2,3</sup> and Yan Jin <sup>2,3,\*</sup>

<sup>1</sup> College of Marine Sciences, Shanghai Ocean University, Shanghai 201306, China, fliuying@163.com (L.-Y.F.)

<sup>2</sup> East China Sea Fisheries Research Institute, Chinese Academy of Fishery Sciences, Shanghai 200090, China

<sup>3</sup> Key Laboratory of East China Sea Fishery Resources Exploitation, Ministry of Agriculture and Rural Affairs, China

\* Correspondence: jiny@ecsf.ac.cn

## 1. Sample preparation

50mg ovary were accurately weighed and extracted using a 400  $\mu$ L methanol: water (4:1, v/v) solution. The mixture was allowed to settle at  $-20^{\circ}\text{C}$  and treated by High throughput tissue crusher Wonbio-96c (Shanghai wan bo biotechnology Co.,Ltd., Shanghai, China) at 50 Hz for 6 min, then followed by vortex for the 30s and ultrasound at 40 kHz for 30 min at  $5^{\circ}\text{C}$ . The samples were placed at  $-20^{\circ}\text{C}$  for 30min to precipitate proteins. After centrifugation at 13,000g at  $4^{\circ}\text{C}$  for 15min, the supernatant was carefully transferred for LC-MS analysis.

## 2. LC-MS analysis conditions

### 2.1. Chromatographic conditions:

2 $\mu$ L of sample was separated by HSS T3 column (100 mm  $\times$  2.1 mm i.d., 1.8  $\mu$ m) and then entered into mass spectrometry detection. The mobile phases consisted of 0.1% formic acid in water:acetonitrile (95:5, v/v) (solvent A) and 0.1% formic acid in acetonitrile:isopropanol:water (47.5:47.5:5, v/v)(solvent B). The solvent gradient changed according to the following conditions: from 0 to 0.1 min, 0% B to 5% B; from 0.1 to 2 min, 5% B to 25% B; from 2 to 9 min, 25% B to 100% B; from 9 to 13 min, 100% B to 100% B; from 13 to 13.1 min, 100% B to 0% B; from 13.1 to 16 min, 0% B to 0% B for equilibrating the systems. The sample injection volume was 2  $\mu$ L and the flow rate was set to 0.4 mL/min. The column temperature was maintained at  $40^{\circ}\text{C}$ . During the period of analysis, all these samples were stored at  $4^{\circ}\text{C}$ .

### 2.2. MS conditions:

The mass spectrometric data was collected using a Thermo UHPLC-Q Exactive Mass Spectrometer equipped with an electrospray ionization (ESI) source operating in either positive or negative ion mode. The optimal conditions were set as followed: heater temperature,  $400^{\circ}\text{C}$ ; Capillary temperature,  $320^{\circ}\text{C}$ ; sheath gas flow rate, 40 arb; Aux gas flow rate, 10 arb; ion-spray voltage floating (ISVF),  $-2800\text{V}$  in negative mode and  $3500\text{V}$  in positive mode, respectively; Normalized collision energy, 20-40-60V rolling for MS/MS. Full MS resolution was 70,000, and MS/MS resolution was 17,500. Data acquisition was performed with the Data Dependent Acquisition (DDA) mode. The detection was carried out over a mass range of 70–1050 m/z.
