# Supplementary material for: LC-MS Based Metabolomic Profiling of Largehead Hairtail (Trichiurus japonicus) Ovary Reveals Metabolic Signatures of Ovarian Developmental Process (II–IV)
Source: MDPI journal article supplement (doi:10.3390/fishes8050262), 2023-05-14
Supplement: s1 [file s1]

Archive with 1 entries (1 files):
- fishes-2353079-supplementary.pdf
